# Supplementary material for: Synthesis of InAl-alloyed Ga2O3 nanowires for self-powered ultraviolet detectors by a CVD method
Source: Royal Society of Chemistry journal article supplement (doi:10.1039/d4ra04176c), 2024-01-01
Supplement: d4ra04176c1.pdf [file d4ra04176c1.pdf]

## Supporting Information

# Synthesis of InAl-alloyed Ga<sub>2</sub>O<sub>3</sub> nanowires for self-powered ultraviolet detectors by CVD method

*Bei Li<sup>a,b</sup>, Zhiyu Dong<sup>b</sup>, Wei Xu<sup>b</sup>, Guowei Li<sup>b</sup>, Xiaozhan Yang<sup>a</sup>, Shuanglong Feng<sup>a</sup>, Wenlin Feng<sup>a\*</sup> and Wenqiang Lu<sup>b\*</sup>*

<sup>a</sup> School of Science, Chongqing University of Technology, Chongqing 400054, P. R. China. Chongqing Key Laboratory of New Energy Storage Materials and Devices, Chongqing 400054, P. R. China.

<sup>b</sup> Chongqing Institute of Green and Intelligent Technology, Chinese Academy of Sciences, Multiscale manufacturing technology Lab, Chongqing, China, 400714; Chongqing School, University of Chinese Academy of Sciences, Chongqing, China, 400714

\*Corresponding Authors: [fengwenlin@cqut.edu.cn](mailto:fengwenlin@cqut.edu.cn); [wqlu@cigit.ac.cn](mailto:wqlu@cigit.ac.cn)

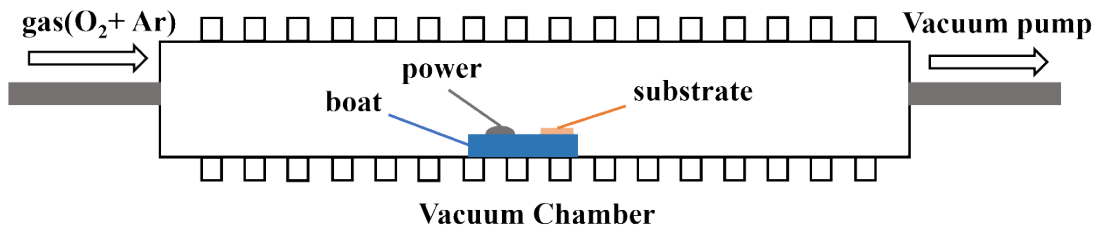

Fig S1. Schematic diagram of CVD experimental device.

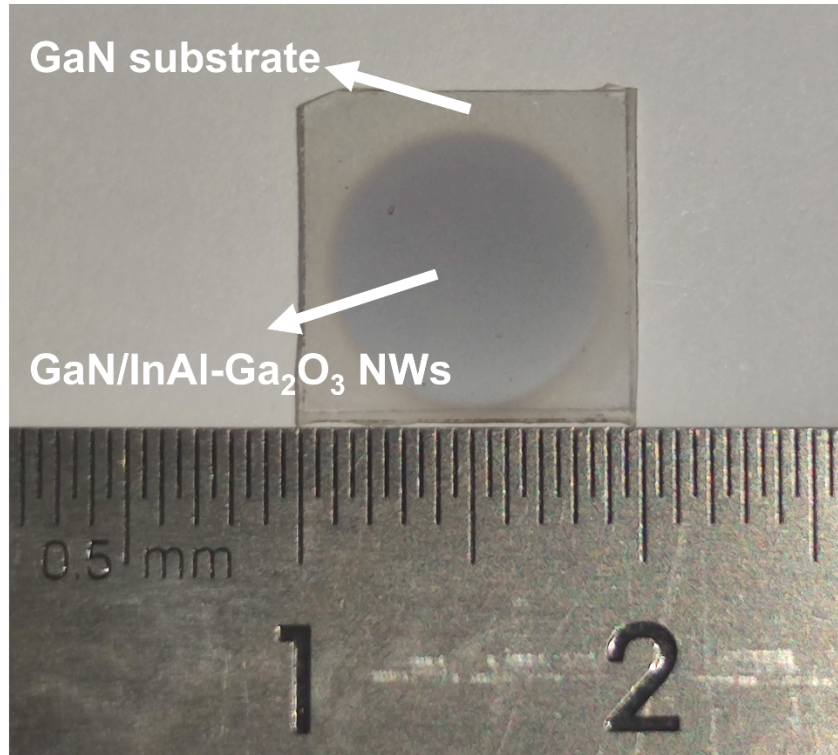

Fig S2 . Physical image of the synthesized GaN/InAl-Ga<sub>2</sub>O<sub>3</sub> NWs p-n junction.

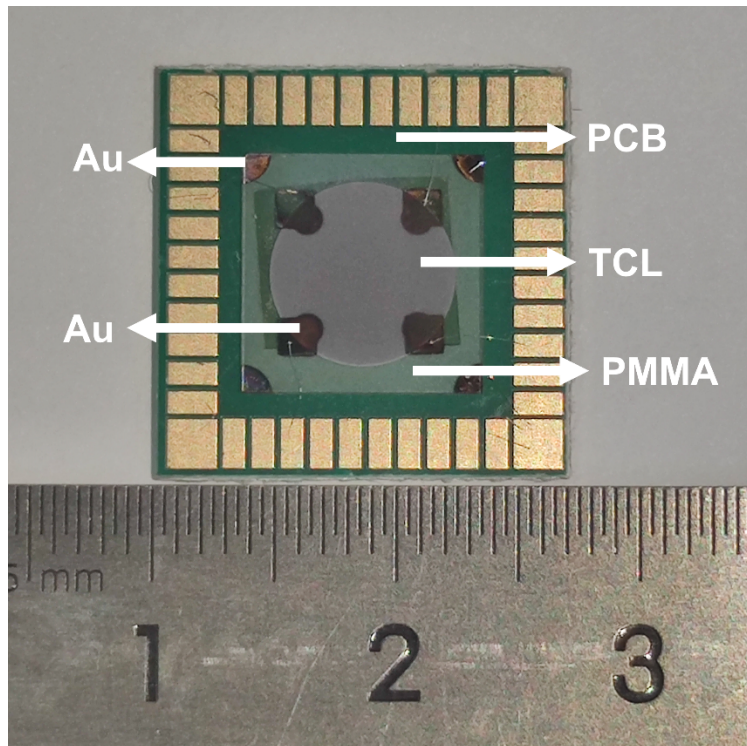

**Fig S3.** Image of prepared GaN/InAl-Ga<sub>2</sub>O<sub>3</sub>NWs photodetector device.

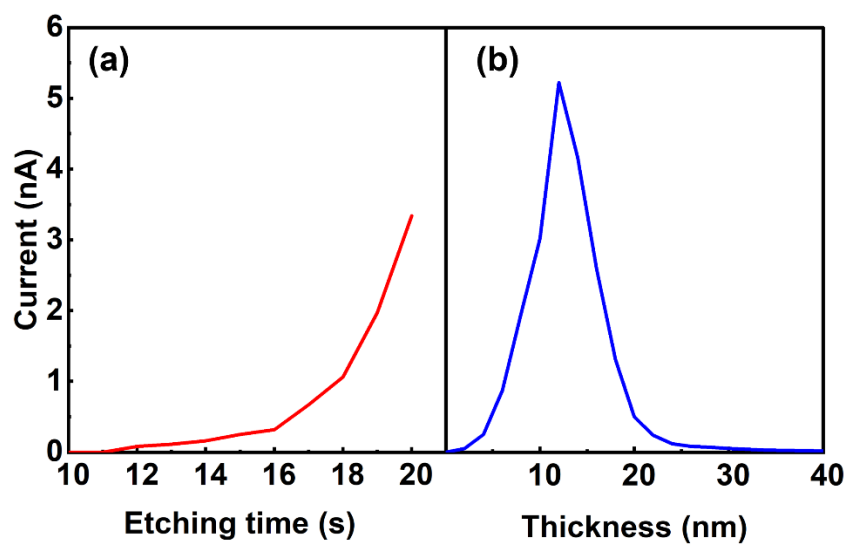

Fig S4. (a) Effect of etching time on photocurrent. (b) Effect of transparent conductive layer Au film thickness on photocurrent.

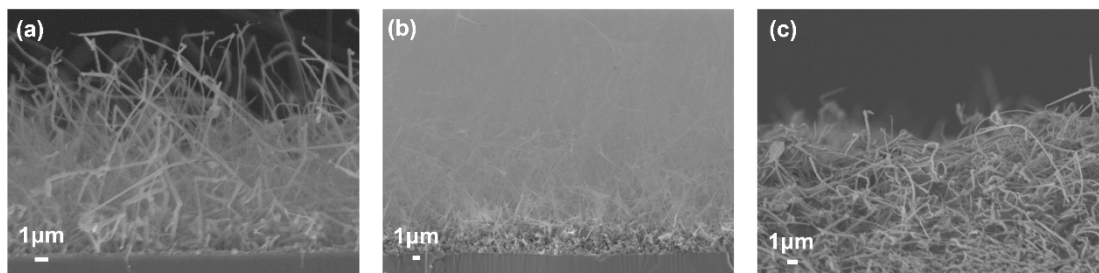

Fig S5. Cross-sections of GaN/InAl-Ga<sub>2</sub>O<sub>3</sub>NWs after different reaction times: (a) 3 min; (b) 5 min; (c) 10 min.
